# Supplementary material for: A Role for the Juxtamembrane Cytoplasm in the Molecular Dynamics of Focal Adhesions
Source: PubMed Central journal article supplement (PMC2627934; doi:10.1371/journal.pone.0004304), 2009-01-28
Supplement: pone.0004304.s003.pdf [file pone.0004304.s003.pdf]

**Table S1.**  $D$  and  $b$  values derived from fitting the FRAP data from the different locations to the analytical expressions of diffusion, exchange and their combination.

| <b>Location</b>      | <b>FA (0)</b>                       |                            | <b>Adjacent (1)</b>                 |                            | <b>1.54 <math>\mu\text{m}</math> (2)</b> |                            | <b>&gt;5 <math>\mu\text{m}</math> (3)</b> |                            |
|----------------------|-------------------------------------|----------------------------|-------------------------------------|----------------------------|------------------------------------------|----------------------------|-------------------------------------------|----------------------------|
| parameter<br>protein | $D$<br>( $\mu\text{m}^2/\text{s}$ ) | $b$<br>( $\text{s}^{-1}$ ) | $D$<br>( $\mu\text{m}^2/\text{s}$ ) | $b$<br>( $\text{s}^{-1}$ ) | $D$<br>( $\mu\text{m}^2/\text{s}$ )      | $b$<br>( $\text{s}^{-1}$ ) | $D$<br>( $\mu\text{m}^2/\text{s}$ )       | $b$<br>( $\text{s}^{-1}$ ) |
| <b>Paxillin</b>      | 0.91                                | 0.11                       | 1.66                                | 1.94                       | 1.75                                     | 9.62                       | 2.41                                      | ---                        |
| <b>Vinculin</b>      | 1.15                                | 0.025                      | 2.68                                | 6.24                       | 3.38                                     | 10.12                      | 5.08                                      | ---                        |
